# Supplementary material for: Untangling the Mistral and seasonal atmospheric forcing driving deep convection in the Gulf of Lion: 2012–2013
Source: Copernicus journal article supplement (doi:10.5194/os-2021-72), 2021-08-09

Figure 1

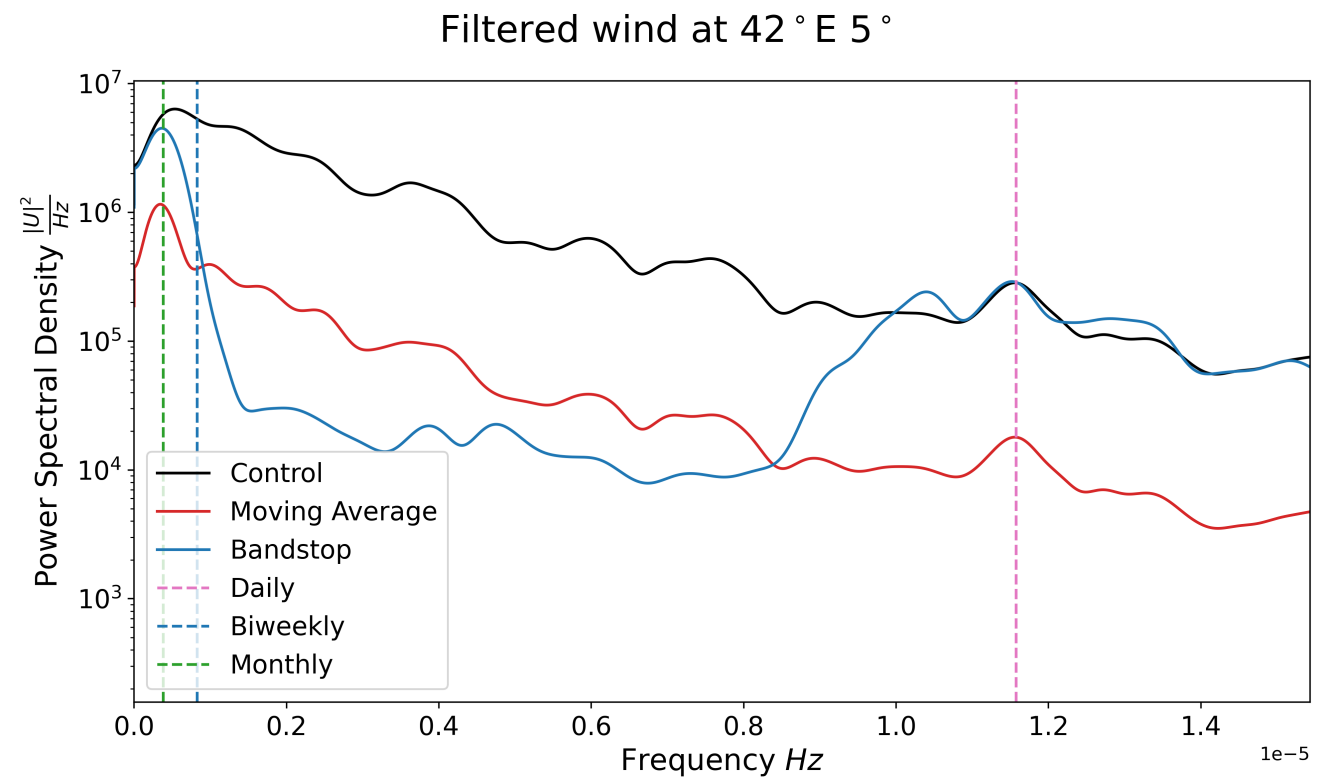

Figure 2

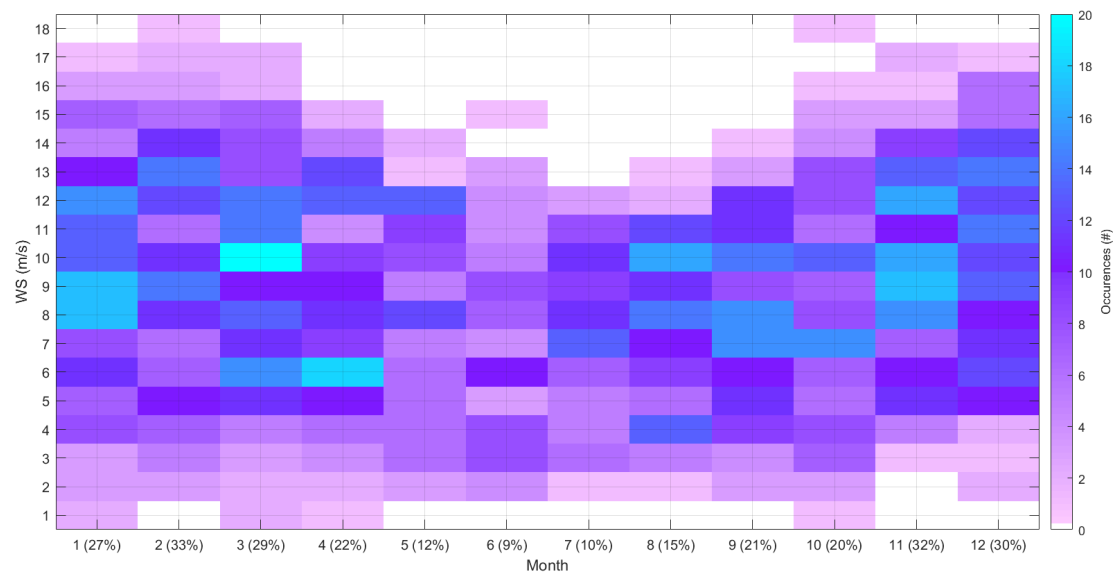

Figure 3

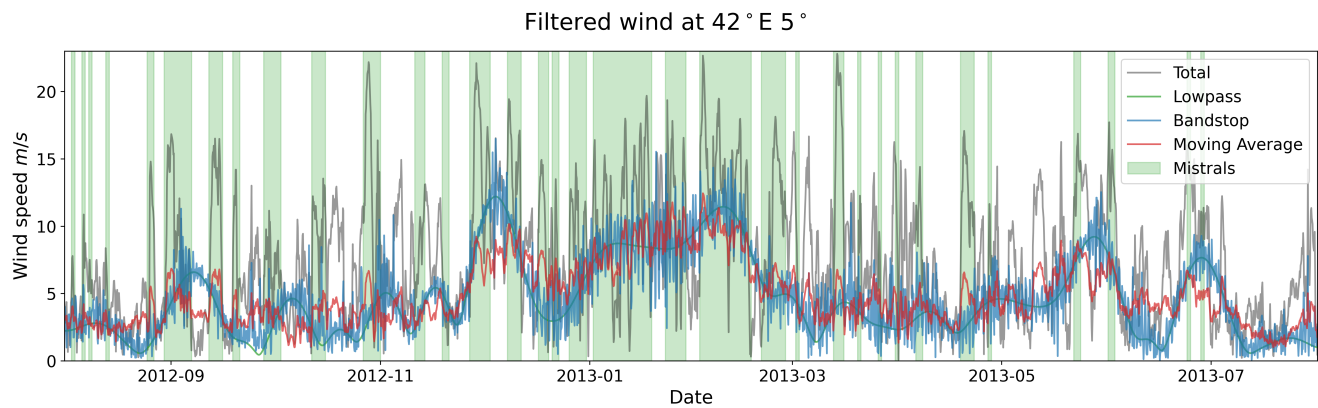

Supplement: Supplementary file [file os-2021-72-AC1-supplement.pdf]
